# Supplementary material
Source: PubMed Central journal article supplement (PMC7923378)
Supplement: pnas.2017488118.sapp.pdf [file pnas.2017488118.sapp.pdf]

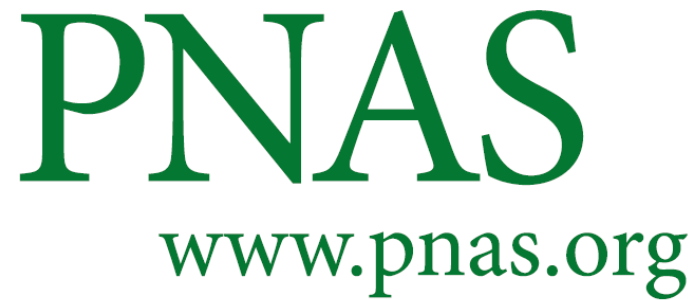

**Supplementary Information for**

Plant egg cell fate determination depends on its exact position in female gametophytes

Yang Sun, Xiu Wang, Lin Pan, Fei Xie, Bo Dai, Mengxiang Sun, Xiongbo Peng  
Corresponding Author: Xiongbo Peng  
Email: [bobopx@whu.edu.cn](mailto:bobopx@whu.edu.cn)

**This PDF file includes:**

Figures S1 to S3  
Tables S1

**Other supplementary materials for this manuscript include the following:**

Movies S1 to S4

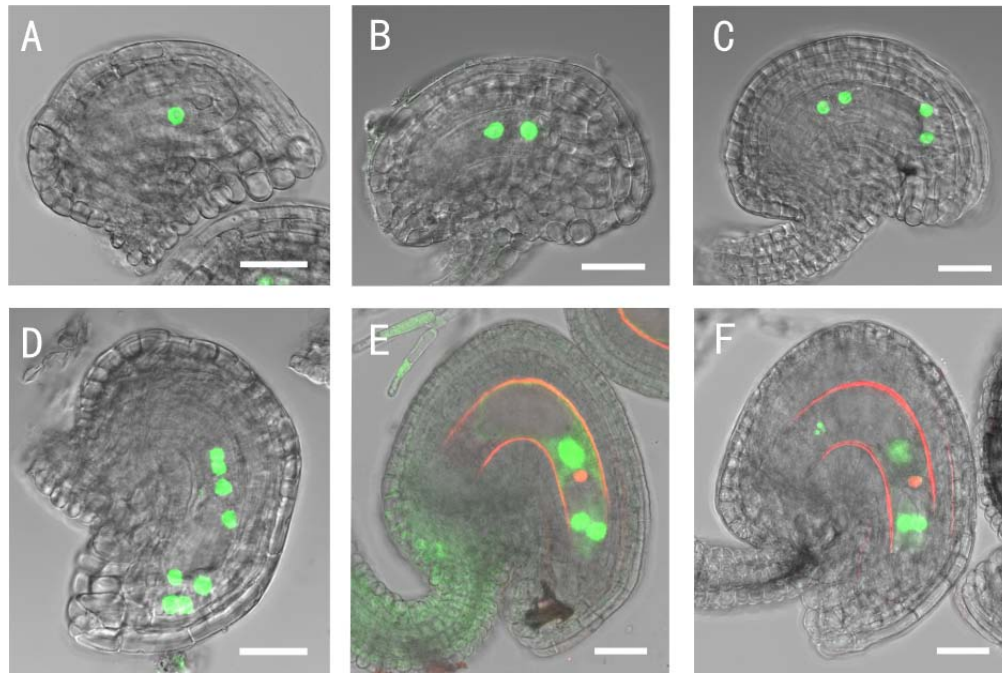

**Fig. S1. Marker line NPCI showing the nuclear position and cell identity**

A-D. *proRH29::H2B-GFP* indicates the nuclear position of the female gametophyte from FG1 to FG5

E. Marker line FGR7.0 shows red fluorescence in the egg cell nucleus (EN), bright green fluorescence in the synergid cell nuclei (SN) and weak green fluorescence in the central cell nucleus (CN).

F. The marker line nuclear position and cell identity (NPCI) were produced by crossing *proRH29::H2B-GFP* with FGR7.0. NPCI shows red fluorescence in the egg cell nucleus (EN), bright green fluorescence in synergid cell nuclei (SN), weak green fluorescence in the central cell nucleus (CN) and green fluorescence in the three antipodal cell nuclei (AN).

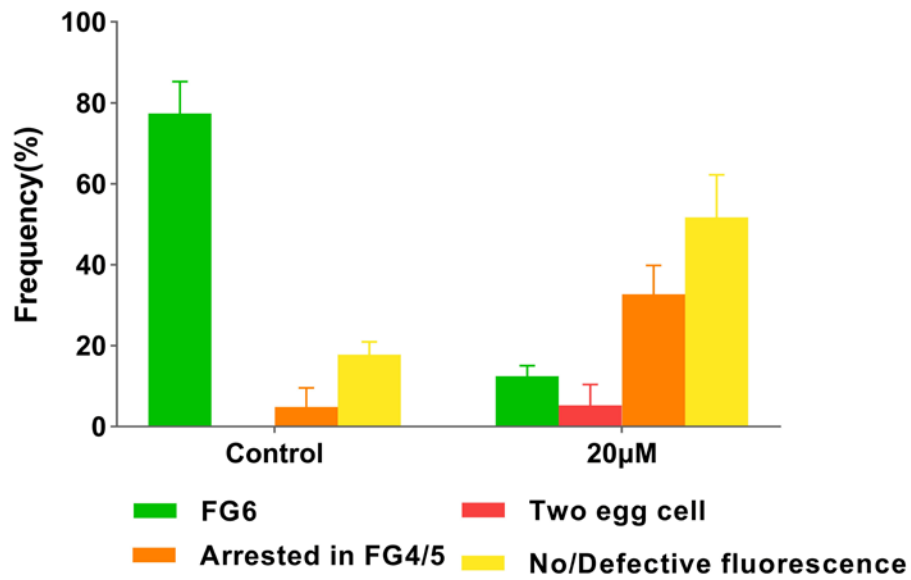

**Fig. S2. Cytochalasin B affects egg cell specialization**

Treatment of ovules enclosing female gametophyte at FG4-1 with 20 µM cytochalasin B (CB) results in two egg cells. The total number of ovules observed was 78 and 138 for the control and 20 µM CB treatment, respectively. The data are means ± SD. At least three biological replicates were performed for each treatment containing 17-31 ovules at FG4-1.

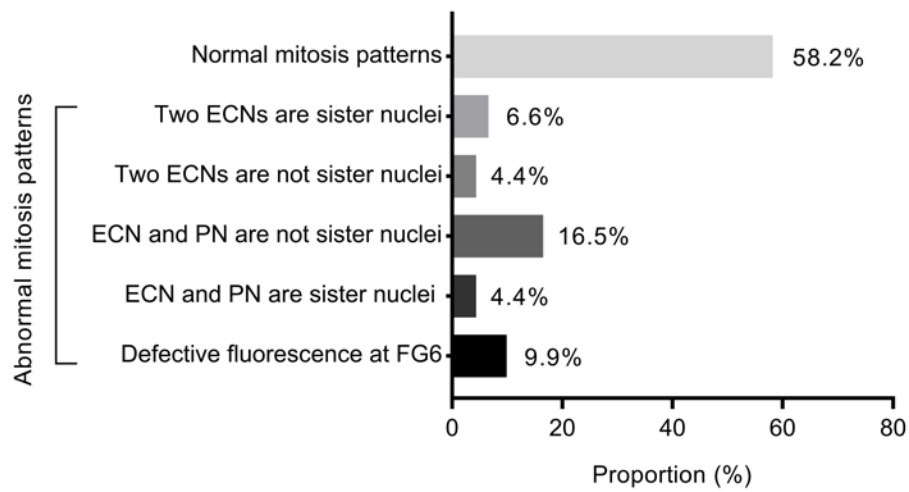

**Fig. S3. Frequency statistics of the development pattern in the *proES2::DN-ACT8* female gametophyte (FG)**

The development pattern analysis was conducted from time-lapse images of each FG. ECN: egg cell nucleus, PN: polar nucleus at micropyle region. At least three biological replicates were performed for each culture containing ovules at FG4. Data are the proportion of FG observed effectively (n = 91) for each development pattern.

**Table S1. Primers used in this study**

|            |                                                          |
|------------|----------------------------------------------------------|
| Es1-pro1   | NNNNCCAACGCGTTGGGACCACAATAAGTGTAAATGCGTTAAAATG           |
| Es1- pro2  | NNNNGGTACCGAAGAGCTCTTAAAATCGCCGTTTACAAAAAGAG             |
| ES2- pro1  | NNNNCCAACGCGTTGGAGCCACATGTTGCAAAAAAGTG                   |
| ES2- pro2  | NNNNGAGCTCAGTGTGTTTTACTTTTAAGAATTTGTG                    |
| Rh29- pro1 | NNNCCAACGCGTTGG TTGAGTCGTTGATTCTTTACCAAAG                |
| Rh29- pro2 | NNNNGTACCGGTATGCAGACTTTACGACTGCAG                        |
| lifeACT-1  | NNNCTCGAGGCCACCATGGGTGTCGCAGATTTGATCAAGAAATTCGAAAGCATCTC |
| lifeACT-2  | GATCAAGAAATTCGAAAGCATCTCAAAGGAAGAAGGAGCCGGATCAGGAGTG     |
| NOS-7      | NNNNACTAGTCCGATCTAGTAACATAGATGACAC                       |
| ACT8-1     | NNNGAATTCGCCACCATGGCCGATGCTGATGACATTC                    |
| ACT8-2     | CCCTGCAGCTTTCATTCCAACAAATGATGGCTG                        |
| ACT8-3     | GGAATGAAAGCTGCAGGGATCCACGAGAC                            |
| ACT8-4     | NNNNACTAGTTTAGAAGCATTTTCTGTGGACAATGC                     |

**Movie S1.**

Nuclear movement and cell specification in the female gametophyte (FG) of NPC1. Time-lapse (10-min interval) movie was acquired from FG4 to FG6 of wild type FG. Numbers indicate the time (hour : min : sec). Scale bar = 10  $\mu$ m.

**Movie S2.**

Two egg cells are the division products of the same nucleus. Time-lapse (10-min interval) movie was acquired from FG4 to FG6 of *proES2::DN-ACT8* female gametophyte. Numbers indicate the time (hour : min : sec). Scale bar = 10  $\mu$ m.

**Movie S3.**

Extra egg cell forms at the expense of the synergid cell. Time-lapse (10-min interval) movie was acquired from FG4 to FG6 of *proES2::DN-ACT8* female gametophyte. Numbers indicate the time (hour : min : sec). Scale bar = 10  $\mu$ m.

**Movie S4.**

Egg apparatus specification does not depend on nuclear lineage. Time-lapse (10-min interval) movie was acquired from FG4 to FG6 of *proES2::DN-ACT8* female gametophyte. Numbers indicate the time (hour : min : sec). Scale bar = 10  $\mu$ m.
